# Supplementary material for: The Arabidopsis homolog of human minor spliceosomal protein U11-48K plays a crucial role in U12 intron splicing and plant development
Source: PubMed Central journal article supplement (PMC4892727; doi:10.1093/jxb/erw158), 2016-04-17
Supplement: supp_erw158_Supplemental_tables_S1_S3_Supplemental_Figures_S1_S7.pdf [file supp_erw158_Supplemental_tables_S1_S3_Supplemental_Figures_S1_S7.pdf]

**Supplementary Table S1.** Gene-specific primer pairs used in RT-PCR experiments.

| Gene                  | Primer (5' to 3')                                                             |
|-----------------------|-------------------------------------------------------------------------------|
| <u>For RT-PCR</u>     |                                                                               |
| At3g04160 (U11-48K)   | Forward: ATGGATCGACCACCGTCGTT<br>Reverse: TGGGCAACGAAGTGAATGAAGAA             |
| At1g56280 (Di19-1)    | Forward: CTTTAGAGTCGAAGAACGCGGTATGC<br>Reverse: GAGAACTCTGTGATCGTGTAGGTGAG    |
| At1g02750 (Di19-2)    | Forward: CGATATAGCAGTGGAGTATCCATGC<br>Reverse: GGCAACTCATCAAGATGAGGTTGAAG     |
| At3g05700 (Di19-3)    | Forward: GGGAAAGAGTTTGCTTGCCCTTTCTG<br>Reverse: CCTCCAAAGAGGCTCTGAAAGTTTCC    |
| At3g06760 (Di19-4)    | Forward: CAGAGTTTATATGCCCTTTTTGCGCTG<br>Reverse: GAAGATCCACCAAGAAGAGACTGTAG   |
| At2g30470 (HSI2)      | Forward: GGTAAGCTAATGAGTCCAGAAAGTAC<br>Reverse: CATGGACTGTATGCATGGAGTGAC      |
| At5g22370 (QQT1)      | Forward: GAAGGTTGCTATTGTTAATCTGGATCC<br>Reverse: CTTGCATCAATGCCGGCAAATATG     |
| At5g44200 (CBP20)     | Forward: GAGAGGATACTGAAGATGCAGTCAAG<br>Reverse: CTTCTTGAGTTATCGCGGCCATAG      |
| At1g54370 (NHX5)      | Forward: CGTGGTTTAATTTCCACGAAGAGTTC<br>Reverse: GAAGAGTATAGAAACAATGCCGGAG     |
| At1g79610 (NHX6)      | Forward: GTTGGTGGTTTAGCGAACATCTCGAAC<br>Reverse: CGATACGATGCCAGATAGACTGAGAC   |
| At2g36010 (E2FA/E2F3) | Forward: CATGCTTGCCTATTGCTTCTAGCTC<br>Reverse: CAACAGCTGTTGGTGCTATTTTCGC      |
| At5g22220 (E2FB/E2F1) | Forward: GTTCTGATGAACCCTCTAATGTCC<br>Reverse: GTGATCTCGTAGCAGTGGATTCTTC       |
| At5g03740 (HDT3)      | Forward: GAATGGCAAACCACTTCACCTAG<br>Reverse: GTCATCATCTTGCTTGGCTTTGAC         |
| At2g21880 (RabG2)     | Forward: GGTCATTGTTCTTGGAGATAGCGG<br>Reverse: GAGGAACTCTGTGTGCCAGTTATTG       |
| At1g16540 (ABA3/los5) | Forward: GATTATTATGGATACCCAGATGGTCCC<br>Reverse: GCATATTCCCTAATAACCAAGTACACTG |
| At2g41740 (VLN2)      | Forward: GATTTGACTGTTATAACAATGTCAAC<br>Reverse: GCAAGTATATAACCGGGTCTC         |
| At3g57410 (VLN3)      | Forward: TAGCCACTAATAACAAAATGTCTGG<br>Reverse: TCCTCCTCCGGTTTTTTAAATC         |
| At3g04630 (WDL1)      | Forward: TGCTTATGGACCGAAACGC<br>Reverse: TTCAAGCTCGTTCCTCTCAG                 |
| At5g12210 (RGTB1)     | Forward: GCTGACAAGCATGTACGTTAC<br>Reverse: CAACGCAGCAGAAAATTTGTC              |
| At3g12070 (RGTB2)     | Forward: GAAGATGAAGTTGTGTCATGGG<br>Reverse: ATGAGACTCCGCTCCAGGTG              |
| At3g51460 (RHD4)      | Forward: AAGCTCTTAAGTGTAGCAGAAAAG<br>Reverse: CTTGTTAACGAGATCAACTGCC          |
| At4g02560 (LD)        | Forward: CGCAAATTGATTCGCAGAGTCAATTGC<br>Reverse: GAATATCATCAGCAGACATTGGGCG    |
| At5g27380 (GSH2)      | Forward: GATCAGATTGGCATAGACTCTGAACG<br>Reverse: GACGGATGATCATTAGGAGTATAGCC    |
| Actin                 | Forward: CAGCAGAGCGGGAAATTGTAAGAG<br>Reverse: TTCCTTTCAGGTGGTGCAACGAC         |

For real-time RT-PCR

|        |                                                                                    |
|--------|------------------------------------------------------------------------------------|
| GA20ox | Forward: ACATGGGTTTCAGCCATTTGGGAAGGTGTA<br>Reverse: AGATGGGTTTGGTGAGCCAATCTGAAAAGG |
| GA3ox  | Forward: CCAACATCACCTCAACTACTG<br>Reverse: CTCTTTCCATGTCACCGATTG                   |
| GA2ox  | Forward: GTGTCGTACAAGGTGTTGGAGA<br>Reverse: CCAAGTCTATAATCACCAAGC                  |
| Actin  | Forward: TGCGATAATGGAAGTGGTATGG<br>Reverse: AAGACAGCCCTGGGCGCATCA                  |

---

**Supplementary Table S2.** Gene-specific primer pairs used in quantitative analysis of splicing efficiency by real-time RT-PCR.

| Gene   |         | Primer (5' to 3')                          |
|--------|---------|--------------------------------------------|
| HSI2   | exon1   | Forward: CCA ACA TGG TCC ATT GCT CT        |
|        | intron1 | Reverse: CTG TCC AGA ATA AAA TAT TTG GC    |
|        | exon2   | Reverse: CAG GCT TTT GGA AGA ACT AG        |
| QQT1   | exon1   | Forward: GCC AAA TAT TTT ATT CTG GAC AG    |
|        | intron1 | Reverse: CAA CAT ACA CCT GCA ATT TTT AAC   |
|        | exon2   | Reverse: AAC ATC TTC TAA CTT GAT CAA TTC   |
| NHX5   | exon1   | Forward: CTC CGC CGT CAT CGA TTC C         |
|        | intron1 | Reverse: TAG CAG CAG CGA ATT TGA AG        |
|        | exon2   | Reverse: GTA ACA ATG GCT CCA AAG TTA G     |
| NHX6   | exon1   | Forward: CGG CGG CTC TGC GTT CTT T         |
|        | intron1 | Reverse: CAA AAT TAG TAA GAG AAG TGC TC    |
|        | exon2   | Reverse: AGT GAA CCT GTT AGT CCT CG        |
| E2FA   | exon1   | Forward: CTC AGG ATC TAC AGG ACA CC        |
|        | intron1 | Reverse: CTG CAC AAC TTC CTA TTT CTA TG    |
|        | exon2   | Reverse: GTT TTC CAA ATA TCC GTC ATG C     |
| E2FB   | exon1   | Forward: AAG CAC CGA AAG AAA CAT GG        |
|        | intron1 | Reverse: AAG AGA GAT TAG ATT AAA TCA CAG   |
|        | exon2   | Reverse: GTG GTC TTG ATC AAA TGT AAT C     |
| HDT3   | exon1   | Forward: GTT TTG AGT GTG ACT GTT GG        |
|        | intron1 | Reverse: TAT CTT CCA GTC TTA AAT ATA GAG   |
|        | exon2   | Reverse: CAG GAG CAG GAA CAG CTT C         |
| GSH2   | exon1   | Forward: GAT TGG CAT AGA CTC TGA AC        |
|        | intron1 | Reverse: CAT AAG AAG TCA AGA TCG ACC       |
|        | exon2   | Reverse: TCC TCT TGT ACA CTC CCT TC        |
| LD     | exon1   | Forward: GTA TTG CTG AAA TCA TGG GTG       |
|        | intron1 | Reverse: GTT AAC TTA TCC AAT GCA TTG AG    |
|        | exon2   | Reverse: TGC GGA CTC TTT CCA GCA G         |
| ABA3   | exon1   | Forward: AGA TGG TCC CAA GAA CAT TC        |
|        | intron1 | Reverse: CAT TAA AAT CTG AGA TTG AAA GCC   |
|        | exon2   | Reverse: GAT GCA TTA AAG TAT TCA AGC AC    |
| Di19-1 | exon1   | Forward: CTT TAG AGT CGA AGA ACG CG        |
|        | intron1 | Reverse: GAA TAT CTG TAA GTT ATA AAC GTA G |
|        | exon2   | Reverse: CAA CAG AAC CAT TAC GAG AAG       |
| Di19-2 | exon1   | Forward: TAT GAT TTA GTT GAA TTG TGT CAC   |
|        | intron1 | Reverse: AAT CAC ATT CAT TAT AGC GAC GG    |
|        | exon2   | Reverse: GCT GAT GAT GAT TCA TAG ATG G     |
| CBP20  | exon1   | Forward: TCC TGT TCT ACT CTA GAG AG        |
|        | intron1 | Reverse: TTA ATT GTA AAG AAA CGG TCA GG    |
|        | exon2   | Reverse: GCT GCC TTT GTG CTT CGA G         |

**Supplementary Table S2. (Continued)**

| Gene  |         | Primer (5' to 3')                           |
|-------|---------|---------------------------------------------|
| RGTB1 | exon1   | Forward: TGG CTT TGC CGG TAA CAC TG         |
|       | intron1 | Reverse: GAT TAA TTA ACA TAT GAA AGT TCC AC |
|       | exon2   | Reverse: ACA TTT CAA TAT TGA GAG ACA GC     |
| RGTB2 | exon1   | Forward: GTG GCT TTG CCG GTA ATA CT         |
|       | intron1 | Reverse: ACA ACA AAC GAA TTA CCG AG         |
|       | exon2   | Reverse: ATA TTG AGA GGC AGC ATA TAG C      |
| RHD4  | exon1   | Forward: GAG CTC ACA ACG CTT GCA TG         |
|       | intron1 | Reverse: ACG TAA CCA TGA AGC GAA AAT AG     |
|       | exon2   | Reverse: TGT ACC GTT TCT CCT AGT GC         |
| VLN2  | exon1   | Forward: GTT CAT TGG CGT TTG TAG TAC        |
|       | intron1 | Reverse: AAC AGT CCA AAC ATT CAG GAA G      |
|       | exon2   | Reverse: CAC CCC CTT TAT TCT GTG TTG        |
| VLN3  | exon1   | Forward: CTC TTG AAG GAA GAG ATT AGC        |
|       | intron1 | Reverse: AAC ATT ACC AGC AAA CTG GTG        |
|       | exon2   | Reverse: CAA ATA GAT AAG CGC CAC CC         |
| WDL1  | exon1   | Forward: ATG CAC CAA ATG TTG GAT CTG        |
|       | intron1 | Reverse: TAA ACA TCC ATA CAT AAG TAT CAA G  |
|       | exon2   | Reverse: CAC TCC TAA ACG TTG GAG C          |

**Supplementary Table S3.** Comparison of U11-48K proteins and other U11/U12-proteins found in diverse plant species and humans.

| 48K      | Species               | Accession No.                  | aa* | Sequence homology (%)** |    |    |    |    |    |    |    |    |    |
|----------|-----------------------|--------------------------------|-----|-------------------------|----|----|----|----|----|----|----|----|----|
|          |                       |                                |     | 1                       | 2  | 3  | 4  | 5  | 6  | 7  | 8  | 9  | 10 |
| Dicots   | <i>A. thaliana</i>    | At3g04160                      | 714 | 75                      | 77 | 40 | 33 | 27 | 33 | 29 | 28 | 24 |    |
|          | <i>E. salsugineum</i> | XP_006408216                   | 733 | 78                      | 39 | 33 | 27 | 32 | 28 | 31 | 23 |    |    |
|          | <i>C. rubella</i>     | XP_006297086                   | 703 | 41                      | 31 | 27 | 32 | 30 | 31 | 24 |    |    |    |
|          | <i>R. communis</i>    | XP_002525479                   | 722 | 35                      | 29 | 32 | 30 | 31 | 20 |    |    |    |    |
|          | <i>G. max</i>         | XP_003535384                   | 687 | 30                      | 32 | 30 | 32 | 19 |    |    |    |    |    |
| Monocots | <i>H. vulgare</i>     | BAJ90436                       | 656 | 58                      | 57 | 91 | 10 |    |    |    |    |    |    |
|          | <i>S. bicolor</i>     | XP_002466198                   | 481 | 85                      | 56 | 13 |    |    |    |    |    |    |    |
|          | <i>Z. mays</i>        | NP_001145685                   | 527 | 55                      | 12 |    |    |    |    |    |    |    |    |
|          | <i>T. urartu</i>      | EMS45165                       | 388 | 3                       |    |    |    |    |    |    |    |    |    |
| Humans   | <i>H. sapiens</i>     | NP_689764                      | 339 |                         |    |    |    |    |    |    |    |    |    |
|          |                       |                                |     |                         |    |    |    |    |    |    |    |    |    |
|          | Number of amino acids |                                |     | Sequence homology (%)   |    |    |    |    |    |    |    |    |    |
|          | Arabidopsis           | Other dicot and monocot plants |     |                         |    |    |    |    |    |    |    |    |    |
| 65K      | 442                   | 441~467                        |     | 55~92                   |    |    |    |    |    |    |    |    |    |
| 59K      | 382                   | 384~420                        |     | 55~93                   |    |    |    |    |    |    |    |    |    |
| 35K      | 333                   | 314~403                        |     | 60~95                   |    |    |    |    |    |    |    |    |    |
| 31K      | 261                   | 261~275                        |     | 60~95                   |    |    |    |    |    |    |    |    |    |
| 25K      | 165                   | 155~187                        |     | 60~95                   |    |    |    |    |    |    |    |    |    |

\*Number of amino acid (aa)

\*\*The sequence homology was calculated using the ClustalW2 program.

**Supplementary Fig. S1** Amino acid sequence comparison of U11-48K proteins in diverse plant species. The alignment was made using the ClustalW2 program. Gaps in the sequences are indicated by dashes. The position of CHHC-type zinc finger and arginine-rich region is indicated by a box and a thick line, respectively. Accession numbers of 48K-related proteins are as follow; *A. thaliana* (At3g04160), *R. communis* (XP\_002525479), *C. clementina* (XP\_006443313), *E. salsugineum* (XP\_006408216), *C. rubella* (XP\_006297086), *G. max* (XP\_003535384), and *M. truncatula* (XP\_003590902).

**Supplementary Fig. S2** Development-defect phenotypes of the *u11-48k* mutant plants. (A) Schematic presentation and the sequences of artificial miRNA2 (amiR2) along with its target U11-48K (48K). Exons and introns are represented as gray boxes and thick lines, respectively. Downregulation of *U11-48K* in the transgenic plants was confirmed by RT-PCR and real-time RT-PCR analysis. (B) Development-defect phenotypes of the *u11-48k* knockdown plants. The wild-type (WT) and artificial miRNA-mediated knockdown mutant (amiR2) plants were grown in soil for the indicated times, and the abnormal leaf shape, arrested stem growth, and delayed senescence of the *u11-48K* mutant plants are shown. Identical results were obtained from three independent experiments, for which a representative example is shown.

**Supplementary Fig. S3** Effect of exogenously applied hormones on the stem length of the wild-type plants. Twenty four-day-old Col-0 plants were treated with 100  $\mu$ M GA, 50  $\mu$ M kinetin, 5  $\mu$ M BR, or 0.5  $\mu$ g/ml NAA, and stem lengths of the plants were measured 2 weeks after the application of each hormone. Values are means  $\pm$  SE obtained from three independent experiments (n=5).

**Supplementary Fig. S4** Splicing of *GA20ox*, *GA3ox*, and *GA2ox* genes in the mutant plants. The splicing patterns of *GA20ox*, *GA3ox*, and *GA2ox* transcripts were analyzed by RT-PCR in wild type (WT), *48k*, and *65k* mutant plants. Exons and introns are represented as gray boxes and thin lines, respectively, and the positions of primers used are indicated by thick lines. The sequences of primer sets are shown. Identical results were obtained from three independent experiments, one of which is shown.

**Supplementary Fig. S5** Abnormal splicing of U12 introns in the *u11-48k* mutant plants. The splicing patterns of selected U12 intron-containing transcripts were analyzed by RT-PCR in wild type (WT) and three different knockdown plants (amiR1-1, amiR1-2, and amiR1-3). Identical results were obtained from three independent experiments, one of which is shown.

**Supplementary Fig. S6** Comparison of abnormal splicing of U12 introns in the *u11/u12-31k*, *u11-48k*, and *u11/u12-65k* mutant plants. The splicing patterns of selected U12 intron-containing transcripts were analyzed by RT-PCR in wild type (WT), *31k*, *48k*, and *65k* mutant plants. Identical results were obtained from three independent experiments, one of which is shown.

**Supplementary Fig. S7** Splicing of selected U2 introns in the mutant plants. The splicing patterns of selected U2 intron-containing transcripts were analyzed by RT-PCR in wild type (WT), *31k*, *48k*, and *65k* mutant plants. Exons and introns are represented as gray boxes and thin lines, respectively, and the positions of primers used are indicated by thick lines. The sequences of primer sets are shown. Identical results were obtained from three independent experiments, one of which is shown.

A. thaliana 1 MDRPPSLPHYQNPENLVEYHPPFNENFNFFRPPPPPLQNPENNYIVSPPPIRELSCTLSSLSKSLSECOITD---SLSQNLALDH  
R. communis 1 -----MNPSSAEPDYEQNSNYLIPNFVHSLQPPPPHITITPTTP---LIDLSTLSSLANLLSLSQOTRN---SLS-----  
C. clementina 1 -----MSSSYAAPPPTSFQQNPNFNSSSIPGQS-----DLSTLSSLALSLFCHQTLQ---NYSF-----  
E. salsugineum 1 MDRRRSFPNYQNPYIFHHQPPFNHNPNFFRPPP--LQNPNTYSIAPSPPPIRELSCTLSSLSKSLSECOITLA---SLSENLALDH  
C. rubella 1 MDRPSPFPHNQENPNFHHVPPFNPNFNFFRPPPPLQNPNTYSIAPSPPPIRELSCTLSSLSKSLSECOITLD---SLSQNLALDH  
G. max 1 -----MHAGGLPLVDWILEELVRRQSRFQGVRSMMNPSFSSSSLSLSTLSSLNLLTSLNHVLSLTPS-----  
M. truncatula 1 -----MNPPEAQLPSPSQLPPLSPPPQCHPPPLLPPLPPLNLLTSSLTNLLFSTQILSTTPQ-----

A. thaliana 87 SLLQKQDENGCFVFCPEFDSNHMPPEALFLHSLRCPNPLDITHLLES---SSYRNTLELPCPEQLNNGDGDLCISLDDLAD--FGSNF  
R. communis 71 --LTKPNKNVKEFCFNPNPNHLMPPESLFLHSLRCPSEFQDPPLSLVNSLHMPKTLNQNPNPNFKNSDNALCLISLGGFYN--EFSNF  
C. clementina 56 --LTPKQNDNLFCFNPNPQHLMPPELFLHSLRCPPLDLDPPNYRNTLHSSLLNQON--APLTIQDHIQELCFSLDDYLSNVRVSF  
E. salsugineum 85 SLLQKQDENGCFVFCPEFDPNHLMPPPEALFLHSLRCPNPLDITHLLES---SSYRNTLELPCPEQLNNGDGDLCISLDDLAD--FGSNF  
C. rubella 87 SYLQKQGGNGCFVFCPEFDSNHMPPEALFLHSLRCPNPLDITHLLES---SSYRNTLELPSQVQLNSDAGDLCVSLDELAD--FGTNE  
G. max 63 -----PPTLNSNLQCFPNFPHLPLPPELFLHSLRCPSPRPLPLNPN-----SPS-LTYPKTLQSSQQLFSLDSLNSN-----F  
M. truncatula 62 ----PQPTTNTLFCLEFNPNHLPPELFLHSLRCPSPRPLPLNPN-----LLSLSYPKTLQSPSIHLSYSLDFTN-----F

A. thaliana 171 FYRDCPGAVKFSFLDGGK---RLLTLFHLVLSVECSDFVGSDF---EKVKKIVLDKCLGVLPDLICAMKNEIDQWRDFP--SSYSSSVLS  
R. communis 158 FYKDCPGAVQFSLDSSS---KTEFLPAVLSVECANFVAR---IEDIKGFDINEFRILPSDLVVKREVESWADV--SMYSMAVFC  
C. clementina 142 FYQDCPFAVAISFPHASTSISKTLALFGLCMECANVVCSDGAEKNAEAGFGEVGRVLSGLDFTREVESWRDHEHMSYSRNVFC  
E. salsugineum 169 FYRDCPGAVNFSFLDGGK---RLLTLFHLVLSVECSDFVGSDF---EKVKKIVLDKCLGVLPDLICAMKNEIDQWRDFP--SSYSSSVLS  
C. rubella 171 FYRDCPGAVNFSFLDGGK---RLLTLFHLVLSVECSDFVGSDF---EKVKKIVLDKCLGVLPDLICAMKNEIDQWRDFP--SSYSSSVLS  
G. max 134 FYRDCPFAVAISFPHASTSISKTLALFGLCMECANVVCSDGAEKNAEAGFGEVGRVLSGLDFTREVESWRDHEHMSYSRNVFC  
M. truncatula 133 FYRDCPFAVAISFPHASTSISKTLALFGLCMECANVVCSDGAEKNAEAGFGEVGRVLSGLDFTREVESWRDHEHMSYSRNVFC

A. thaliana 251 STVCSKVEISALRKKWLVNSTRYGVITDTYMRDHFLLFRLCLSAVKEAGCFERMESDATDVGEQKIMSCKSSSTFPCVFTQVLSWLAS  
R. communis 238 AILRLNVIKGSDLRRWIIFNSPRYGVVIVYMRDHISVLFRLCLNAIRREAFSFMGHQMN-----VKISSNCPVLSQVFMWVP  
C. clementina 232 AILGLRTVNVISLQKWLNVNSTRYGVITDTYMRDHFLLFRLCLSAVKEAGCFERMESDATDVGEQKIMSCKSSSTFPCVFTQVLSWLAS  
E. salsugineum 249 SILGSEANETSLSWLVNSTRYGVITDTYMRDHFLLFRLCLSAVKEAGCFERMESDATDVGEQKIMSCKSSSTFPCVFTQVLSWLAS  
C. rubella 247 AILGSKALETSELNSWLVNSTRYGVITDTYMRDHFLLFRLCLSAVKEAGCFERMESDATDVGEQKIMSCKSSSTFPCVFTQVLSWLAS  
G. max 213 AILGLGANDRDLTDMWIANSPRYGVITDTYMRDHFLLFRLCLSAVKEAGCFERMESDATDVGEQKIMSCKSSSTFPCVFTQVLSWLAS  
M. truncatula 209 AILGIGAKSEMVNWLNSSTRYGVITDTYMRDHFLLFRLCLSAVKEAGCFERMESDATDVGEQKIMSCKSSSTFPCVFTQVLSWLAS

A. thaliana 341 QLVVLYGEGNGKFFALDMFKQCIYESASQVMLFRLEGRRSKSCGVVE---LDDARLRNKDVIEMKPEFNSSGGCGKTLDS---PQVIS  
R. communis 318 QLVVLYGERNAKCFATLHFCQICILDVSNMIFP-----LEANKEISTEINGNGSDVRDLKIQEPLBGSIKCETDABVEHVDKEVIF  
C. clementina 318 QLVVLYGQVSGKIFALEIFKQCILEASGILLFPLEQSLTESLDLKEGDLTLHASSSGARDVVRQEPFERNANSGLDETVEGTVHVKVIF  
E. salsugineum 339 QLVVLYGEGNGKFFALDMFKQCIYESASQVMLFRLEGRRSKSCGVVE---LDDARLRNKDVIEMKPEFNSSGGCGKTLDS---PQVIS  
C. rubella 337 QLVVLYGEGNGKFFALDMFKQCIYESASQVMLFRLEGRRSKSCGVVE---LDDARLRNKDVIEMKPEFNSSGGCGKTLDS---PQVIS  
G. max 289 QVSLYLYGAANGKAVLVNFVKKICILVGSVILLFPLGDNAAKQESQNLGTESGDPKAKPGAQCCEKKNWIL-----NRKIS  
M. truncatula 272 QVSLYLYGVS-GKLEVLNFVKKICILVGSVILLFPLGDNAAKQESQNLGTESGDPKAKPGAQCCEKKNWIL-----NRKIS

A. thaliana 425 VSRVAASVAALHERSLEEKIRAVR---YAQPLRYQRIISLHLSLIPHVSENRNRCSYRPIIDHDLGRPRORSINQDMDRKMKTREELL  
R. communis 401 VSRVAASVAALHERSLEEKIRAVR---YAQPLRYQRIISLHLSLIPHVSENRNRCSYRPIIDHDLGRPRORSINQDMDRKMKTREELL  
C. clementina 408 VSRVAASVAALHERSLEEKIRAVR---YAQPLRYQRIISLHLSLIPHVSENRNRCSYRPIIDHDLGRPRORSINQDMDRKMKTREELL  
E. salsugineum 423 VSRVAASVAALHERSLEEKIRAVR---YAQPLRYQRIISLHLSLIPHVSENRNRCSYRPIIDHDLGRPRORSINQDMDRKMKTREELL  
C. rubella 414 VSRVAASVAALHERSLEEKIRAVR---YAQPLRYQRIISLHLSLIPHVSENRNRCSYRPIIDHDLGRPRORSINQDMDRKMKTREELL  
G. max 366 VSRVAASVAALHERSLEEKIRAVR---YAQPLRYQRIISLHLSLIPHVSENRNRCSYRPIIDHDLGRPRORSINQDMDRKMKTREELL  
M. truncatula 332 VSRVAASVAALHERSLEEKIRAVR---YAQPLRYQRIISLHLSLIPHVSENRNRCSYRPIIDHDLGRPRORSINQDMDRKMKTREELL

A. thaliana 512 ABERDYKRRRMSYRGKVKRTPROVLEHPIEYIEEIKLAGGIGCFEKGMPLOSSEPIGN---DQKESDFGYS-----IPSTDKW  
R. communis 486 ABERDYKRRRMSYRGKVKRTPROVLEHPIEYIEEIKLAGGIGCFEKGMPLOSSEPIGN---DQKESDFGYS-----IPSTDKW  
C. clementina 496 ABERDYKRRRMSYRGKVKRTPROVLEHPIEYIEEIKLAGGIGCFEKGMPLOSSEPIGN---DQKESDFGYS-----IPSTDKW  
E. salsugineum 508 ABERDYKRRRMSYRGKVKRTPROVLEHPIEYIEEIKLAGGIGCFEKGMPLOSSEPIGN---DQKESDFGYS-----IPSTDKW  
C. rubella 499 ABERDYKRRRMSYRGKVKRTPROVLEHPIEYIEEIKLAGGIGCFEKGMPLOSSEPIGN---DQKESDFGYS-----IPSTDKW  
G. max 451 ABERDYKRRRMSYRGKVKRTPROVLEHPIEYIEEIKLAGGIGCFEKGMPLOSSEPIGN---DQKESDFGYS-----IPSTDKW  
M. truncatula 417 ABERDYKRRRMSYRGKVKRTPROVLEHPIEYIEEIKLAGGIGCFEKGMPLOSSEPIGN---DQKESDFGYS-----IPSTDKW

A. thaliana 590 -KGENRADIEYPIDNQNQKVKRHDYDSSGSSORQSHRSYKSDRRD-----KLRDRRDR-----NDRRD  
R. communis 573 NHYQKQSHIDNNNRSAACKNASQDYERWRKVNHRHSHVYEQKDSDRHGRDYSSASPERHKGHGPLHERDEAFNISKRHDVRSNGK  
C. clementina 583 NHYQKQSHIDNNNRSAACKNASQDYERWRKVNHRHSHVYEQKDSDRHGRDYSSASPERHKGHGPLHERDEAFNISKRHDVRSNGK  
E. salsugineum 595 -KGENRADIEYPMDRHTDKKRYEYDSSGSSORRSHRSYKQHSDEEYDSSSSORQSHRSYKSDRRD-----NDRRD  
C. rubella 586 -KGENRADIEYKDNFNNDKVNREHEYDSSGSSORRSHRSYKSDRRD-----NDRRD  
G. max 538 RCSECCSDSNCCDQSKLEDAFSDRYQORHEHRSYCRBEDQONADQGYHRDRHSISPERYSSY-----SDRRD  
M. truncatula 507 DHEEQSHITNSDKSKVVDATSRDYQORQGHQGSHEHGGDERGTDQ-ENHRSHASTSPERHRSR-----SDRRD

A. thaliana 654 DEFTRNRKHSLEGS-YQNYSSSEKSSSDYKTKEDDQYDRRSQOPRNLNLFEDRYLPTKE-----  
R. communis 663 SNYQNYSSCFGSDSANDPGVQKDGDKLDVRDWLRLNSYGTSSSTFLVKNAFEDRYDPAE-----  
C. clementina 660 MELTANGRIGVERQSLGSSKYCDYRSYSTNSHRRRRRNDHSDTLVNRNAFEDRYDPEESHNRDENVSDGGYIKPE-----  
E. salsugineum 666 DEFTRNRKHSLEGS-YQNYSSSEKSSSDYKTKEDDQYDRRSQOPRNLNLFEDRYLPTKE-----  
C. rubella 642 DEFTRNRKHSLEGS-YQNYSSSEKSSSDYKTKEDDQYDRRSQOPRNLNLFEDRYLPTKE-----  
G. max 604 ---SRSEHSSHNKQDYYPNRKHNSSRIKDGWQKDHRSHSISDFNNAFSDRYDPEESLVICEDDISSDSKYIKSKDFYDKEGY---  
M. truncatula 572 ---SRSEHHRVHEEKQDYSGRKKYNNSSRTKDRWQNDHKNHISDSFS-----RSDPESRSGVGEHDISSDDKYIKFLCLLEALVRLSC

A. thaliana -----  
R. communis -----  
C. clementina -----  
E. salsugineum -----  
C. rubella -----  
G. max -----  
M. truncatula 653 DEVTSMGLQMLVTTEEVWAQHETVFNFFLLQEKSSQFFLCTRAEQSYVVRWIVTCLCPFFRT

Supplementary Fig. S1

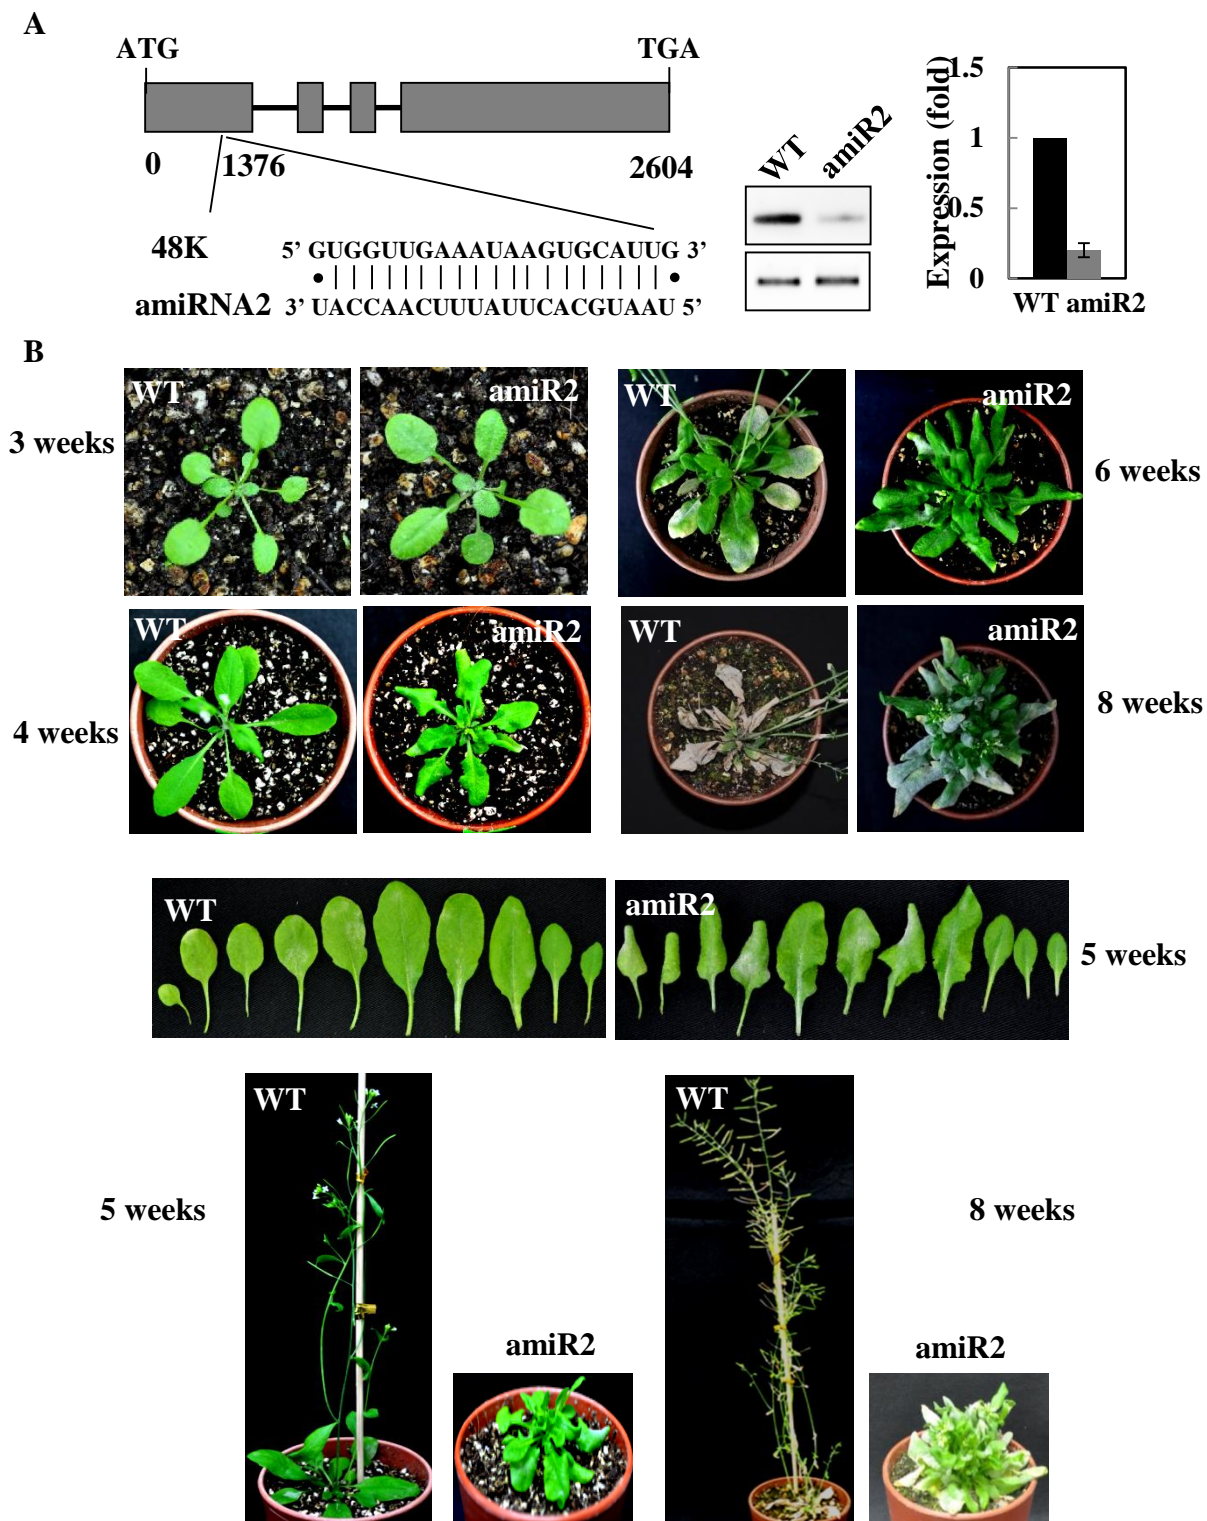

Supplementary Fig. S2



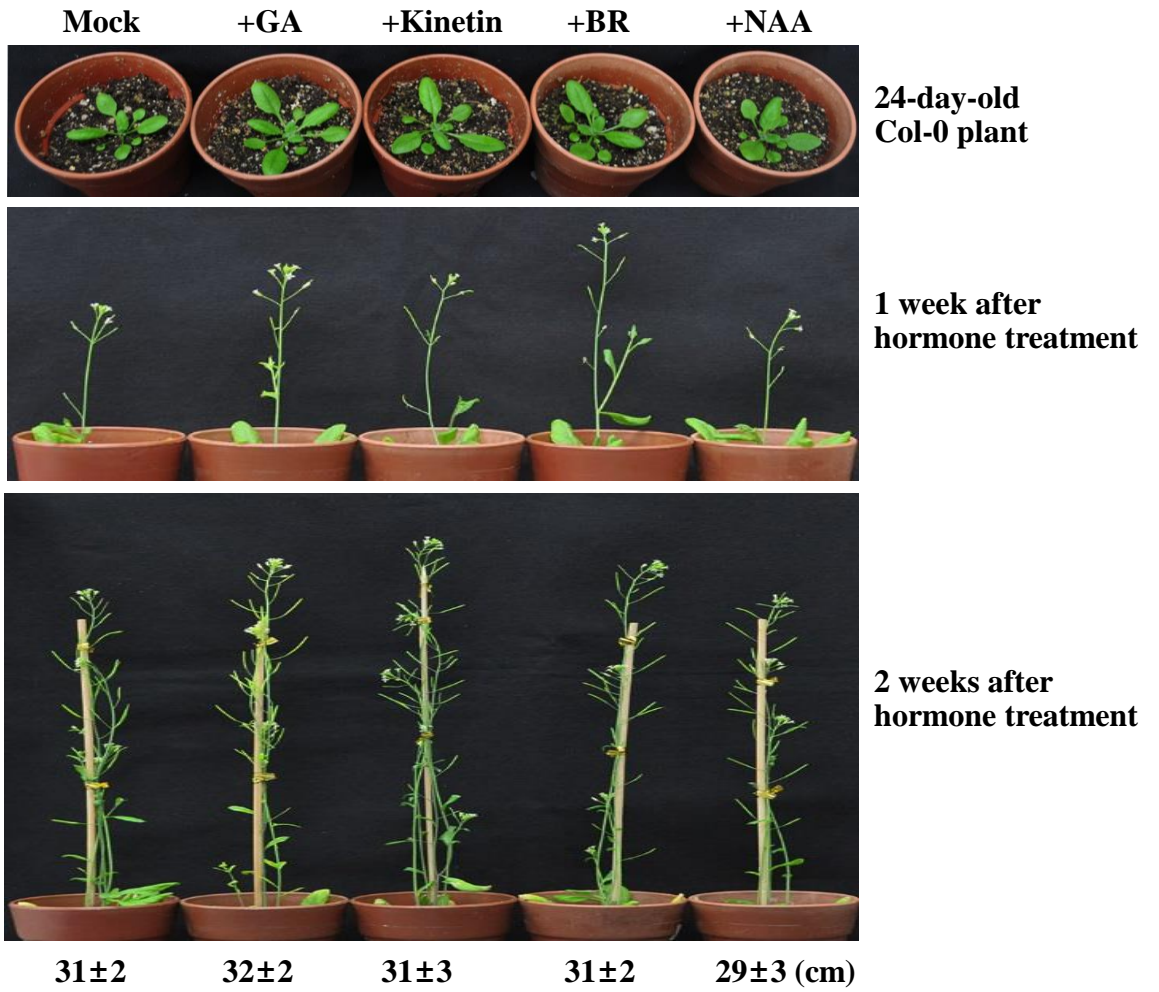

**Supplementary Fig. S3**

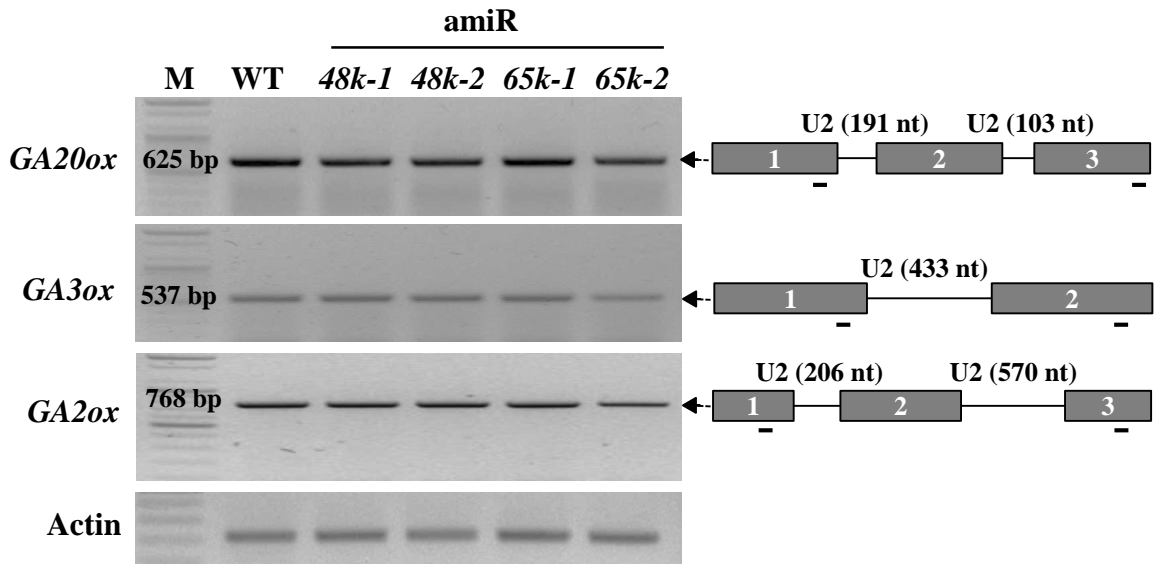

*GA20ox* Forward: GATTACTTCTGCGATGCGTTGGGACATGGG  
Reverse: AGATGGGTTTGGTGAGCCAATCTGAAAAGG

*GA3ox* Forward: CCAACATCACCTCAACTACTG  
Reverse: CTCTTTCATGTCACCGATTG

*GA2ox* Forward: GCAGGAGGCTATTGGCTTCTTC  
Reverse: CCAAGTCTATAATCACCAAGC

*Actin* Forward: CAGCAGAGCGGGAAATTGTAAGAG  
Reverse: TTCCTTTCAGGTGGTGCAACGAC

**Supplementary Fig. S4**

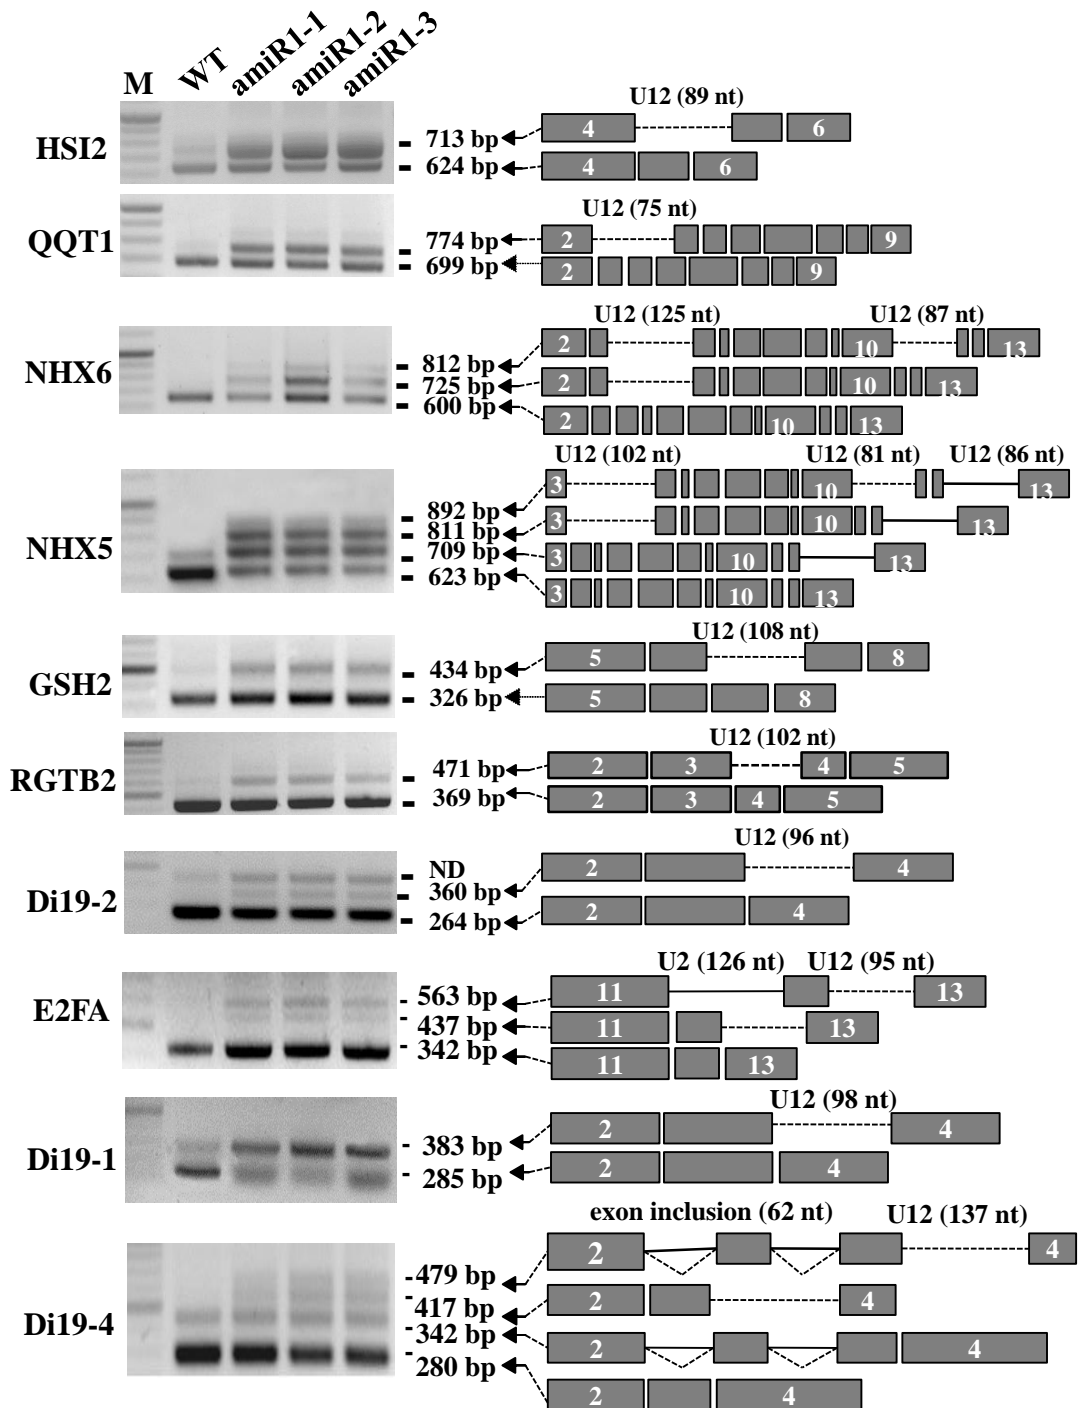

Supplementary Fig. S5

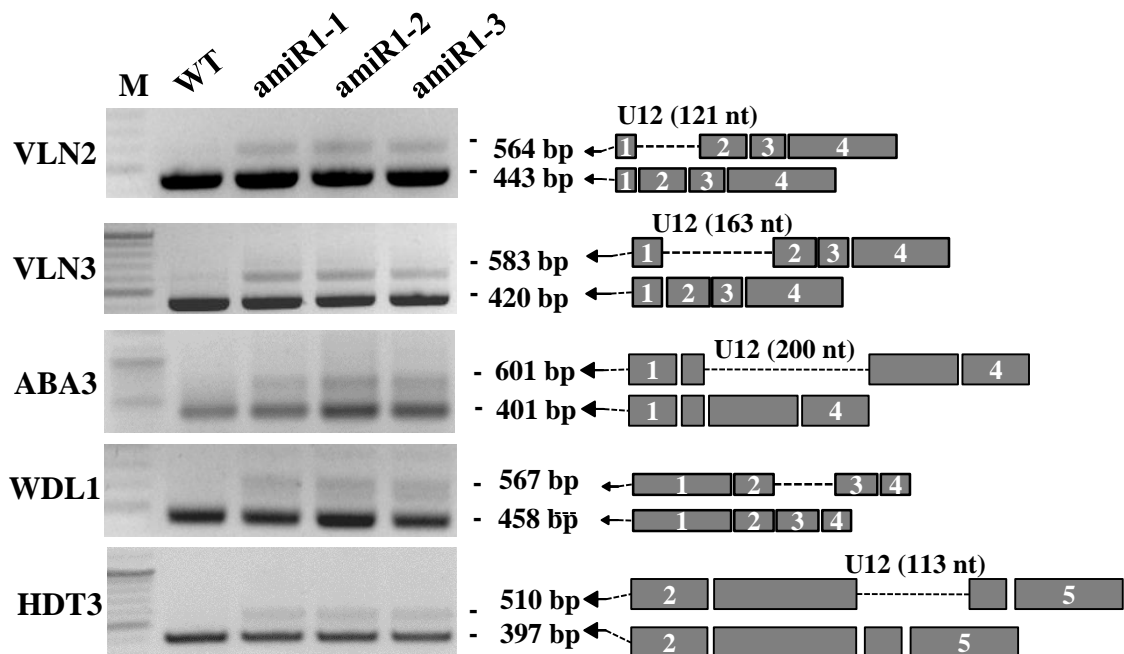

Supplementary Fig. S5 (Continued)



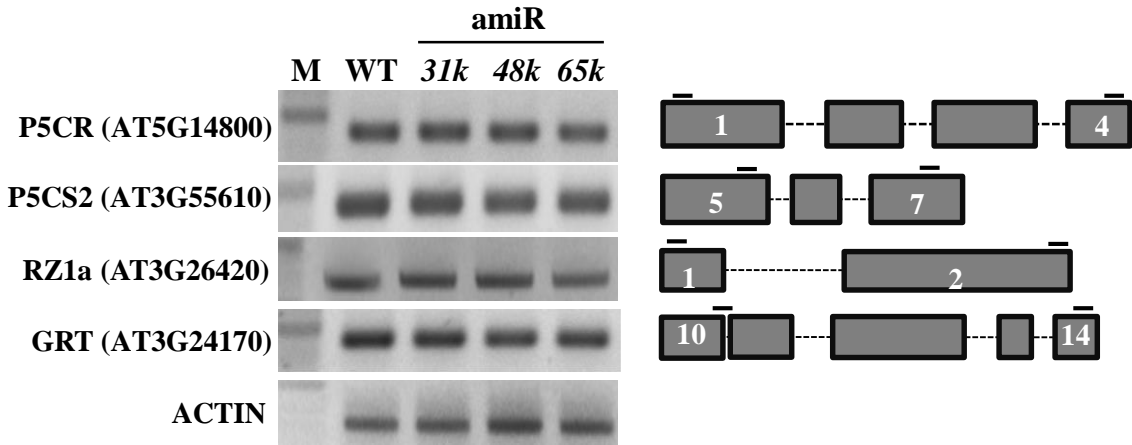

P5CR Forward: 5' TCCGGCGGAGAGTTTCAAGGTAG 3'

P5CR Reverse: 5' CAGCGGCAGGTGTATTAGGCATC 3'

P5CS2 Forward: 5' TGATGCTATAAGCACTCGCAGAGCC 3'

P5CS2 Reverse: 5' TTGATGGAACAGGGTACCAACACG 3'

RZ1a Forward: 5' ATGTCTGAAGATCCGGAG 3'

RZ1a Reverse: 5' GTGGAAACCACCAGCTCTG 3'

GRT Forward: 5' AGGCTGGAGCTGTGAAGGTTGAC 3'

GRT Reverse: 5' CATGATCTCAGCTGCATCAGGACC 3'

**Supplementary Fig. S7**
